# Supplementary material for: Combining Primed Photoconversion and UV-Photoactivation for Aberration-Free, Live-Cell Compliant Multi-Color Single-Molecule Localization Microscopy Imaging
Source: MDPI journal article supplement (doi:10.3390/ijms18071524), 2017-07-14
Supplement: s1 [file s1]

## **Supplementary**

# **Combining Primed Photoconversion and UV-Photoactivation for Aberration-Free, Live-Cell Compliant Multi-Color Single-Molecule Localization Microscopy Imaging**

**David Virant, Bartosz Turkowyd, Alexander Balinovic and Ulrike Endesfelder \***

Department of Systems and Synthetic Microbiology, Max Planck Institute for Terrestrial Microbiology  
& LOEWE Center for Synthetic Microbiology (SYNMIKRO), Karl-von-Frisch-Str. 16, 35043 Marburg, Germany

\* Correspondence: [ulrike.endesfelder@synmikro.mpi-marburg.mpg.de](mailto:ulrike.endesfelder@synmikro.mpi-marburg.mpg.de); Tel.: +49-6421-28-21619

**Figure S1 –S4**

**Table S1**

**Supplementary Materials and Methods**

**a) High intensity ( $1 \text{ kW} \cdot \text{cm}^{-2}$ ) 488 nm illumination**

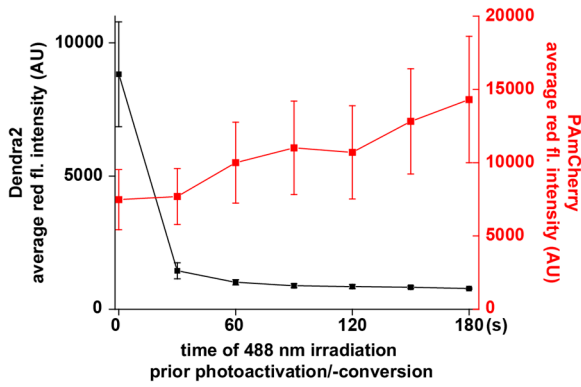

**b)**

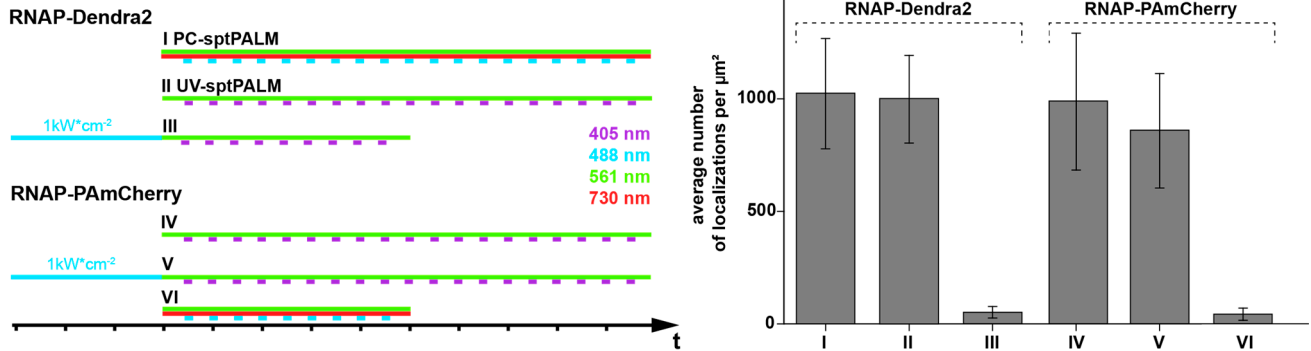

**Figure S1: (a)** Influence of high intensity ( $1 \text{ kW}/\text{cm}^2$ ) 488 nm light illumination measured by the average red fluorescence intensity of PAmCherry and Dendra2 as a function of time of exposure by 488 nm light prior photoactivation/-conversion (for details, see materials and methods). Black graph: Dendra2 average fluorescence intensity; red graph: PAmCherry average fluorescence intensity. **(b) Left:** schemes representing illumination sequences for MG1655 RNAP-Dendra2 and MG1655 RNAP-PAmCherry samples serving as quantitative controls. Violet line: 405 nm light, blue line: 488 nm light, green line: 561 nm light, red line: 730 nm light. More details and laser intensities can be found in the materials and methods section. **Right:** average number of RNAP localizations per  $\mu\text{m}^2$  identified during the imaging. **(I)** MG1655 RNAP-Dendra2 cells imaged with primed conversion-PALM.  $n = 13$  cells; **(II)** MG1655 RNAP-Dendra2 cells imaged with UV-PALM.  $n = 21$  cells; **(III)** MG1655 RNAP-Dendra2 cells illuminated with 488 nm light before imaging and imaged with UV-PALM.  $n = 21$  cells; **(IV)** MG1655 RNAP-PAmCherry cells imaged with UV-PALM.  $n = 16$  cells; **(V)** MG1655 RNAP-PAmCherry cells illuminated with 488 nm light before imaging and imaged with UV-PALM.  $n = 13$  cells; **(VI)** MG1655 RNAP-PAmCherry cells imaged with primed conversion-PALM.  $n = 21$  cells.

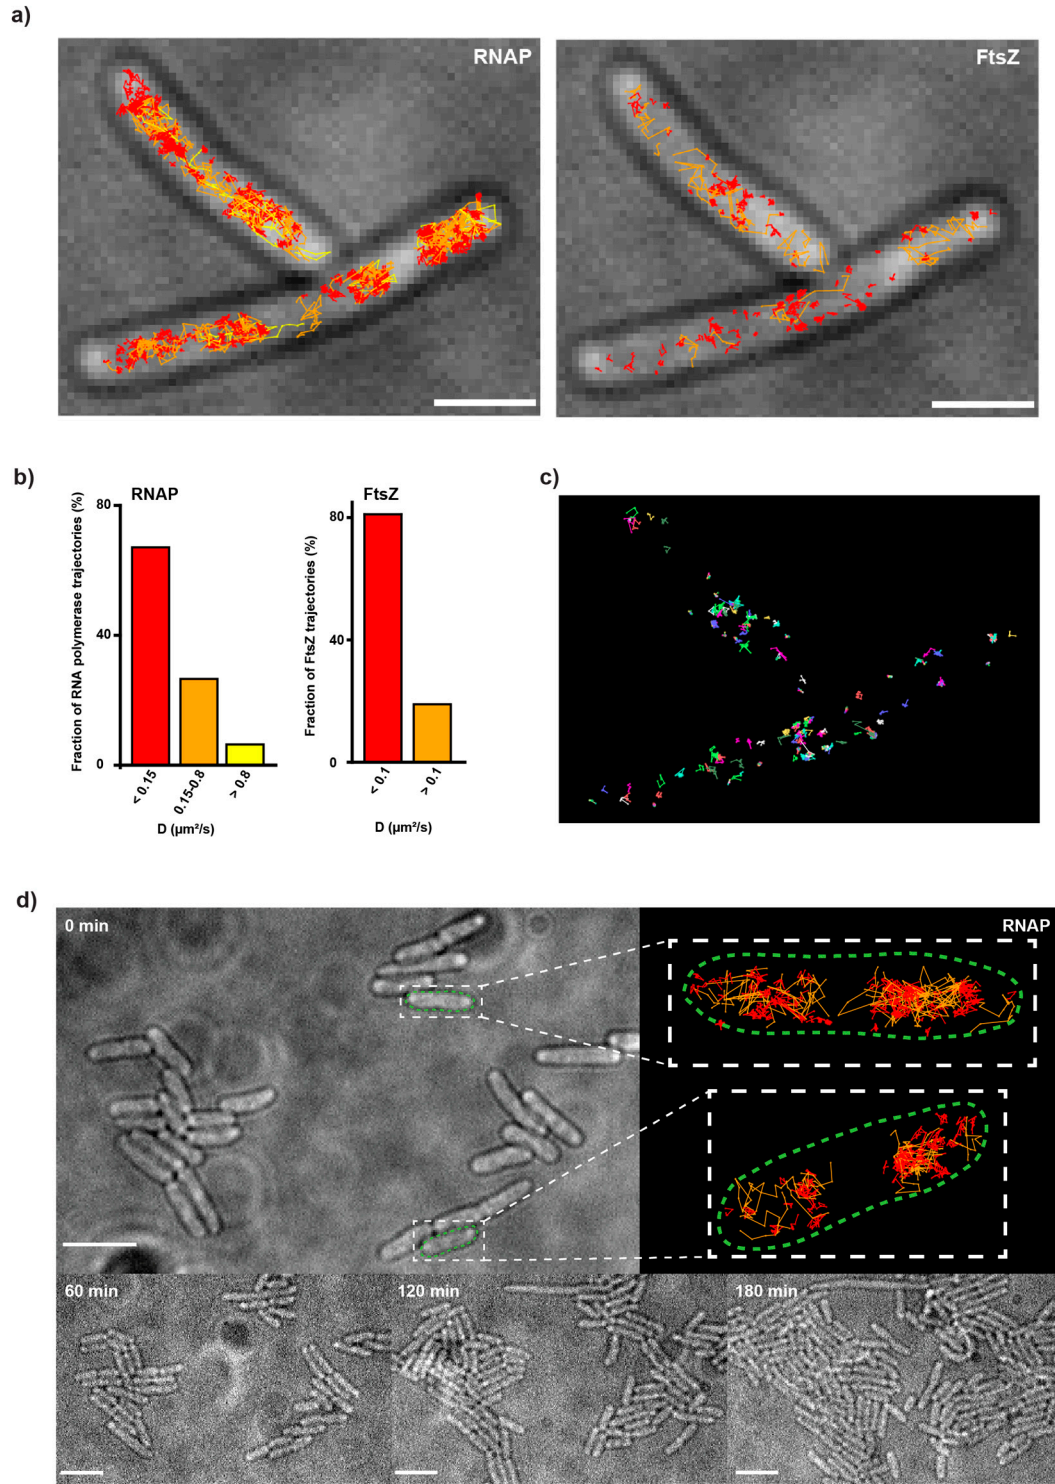

**Figure S2: Live-cell single-particle tracking PALM (sptPALM) in *E. coli* cells.** (a) Trajectories of RNAP molecules (left) and FtsZ (right). The individual trajectories are color coded by their apparent diffusion coefficient  $D$  and classified into categories. RNAP:  $0.0-0.15 \mu\text{m}^2/\text{s}$  (red),  $0.15-0.8 \mu\text{m}^2/\text{s}$  (orange), faster than  $0.8 \mu\text{m}^2/\text{s}$  (yellow) and FtsZ:  $0.0-0.1 \mu\text{m}^2/\text{s}$  (red), faster than  $0.1 \mu\text{m}^2/\text{s}$  (orange). This classification is based on recent literature on the protein dynamics [1,2] and chosen to be the same as in the histograms in (b). Scale bar:  $2 \mu\text{m}$ . (b) RNAP and FtsZ diffusion coefficient distribution histograms. RNAP molecules were classified by their diffusion coefficient as follows: slower than  $0.15 \mu\text{m}^2/\text{s}$  (67% of the whole population), faster than  $0.15$  and slower than  $0.80 \mu\text{m}^2/\text{s}$  (27%), and faster than  $0.80 \mu\text{m}^2/\text{s}$  (6%).  $n = 471$  trajectories. This is in accordance with literature values [2,3]. FtsZ molecules were sorted into two classes: slower than  $0.1 \mu\text{m}^2/\text{s}$  (81% of the population- structural FtsZ) and faster than  $0.1 \mu\text{m}^2/\text{s}$  (19%). These values are also in

accordance with literature values [1].  $n = 174$  trajectories. **(c)** FtsZ trajectories of the structural FtsZ molecules ( $D < 0.1 \mu\text{m}^2/\text{s}$ ) shown by distinct colors to visualize individual trajectories. **(d)** Cell growth after dual-color sptPALM imaging. Cells are not affected by the in total 9-minute-read-out (2 min for RNAP-mEos3.2-A69T, 2 minutes of 488 nm bleaching of unconverted mEos3.2-A69T and 5 min for FtsZ-PAmCherry (due to the slower frame rate of 30 ms to obtain the same number of images as for RNAP-mEos3.2-A69T imaged by 13 ms frames) imaging procedure. Big bright light image: cells at the beginning of the experiment. On the right, two examples of RNAP trajectories in single cells are shown; red trajectories are for slowly diffusing RNAPs with  $D < 0.15 \mu\text{m}^2/\text{s}$  and orange trajectories for RNAP with  $0.15 \mu\text{m}^2/\text{s} < D < 0.8 \mu\text{m}^2/\text{s}$ . Bottom bright light images: cells after one, two and 3 h of growth. Scale bars: 5  $\mu\text{m}$ .

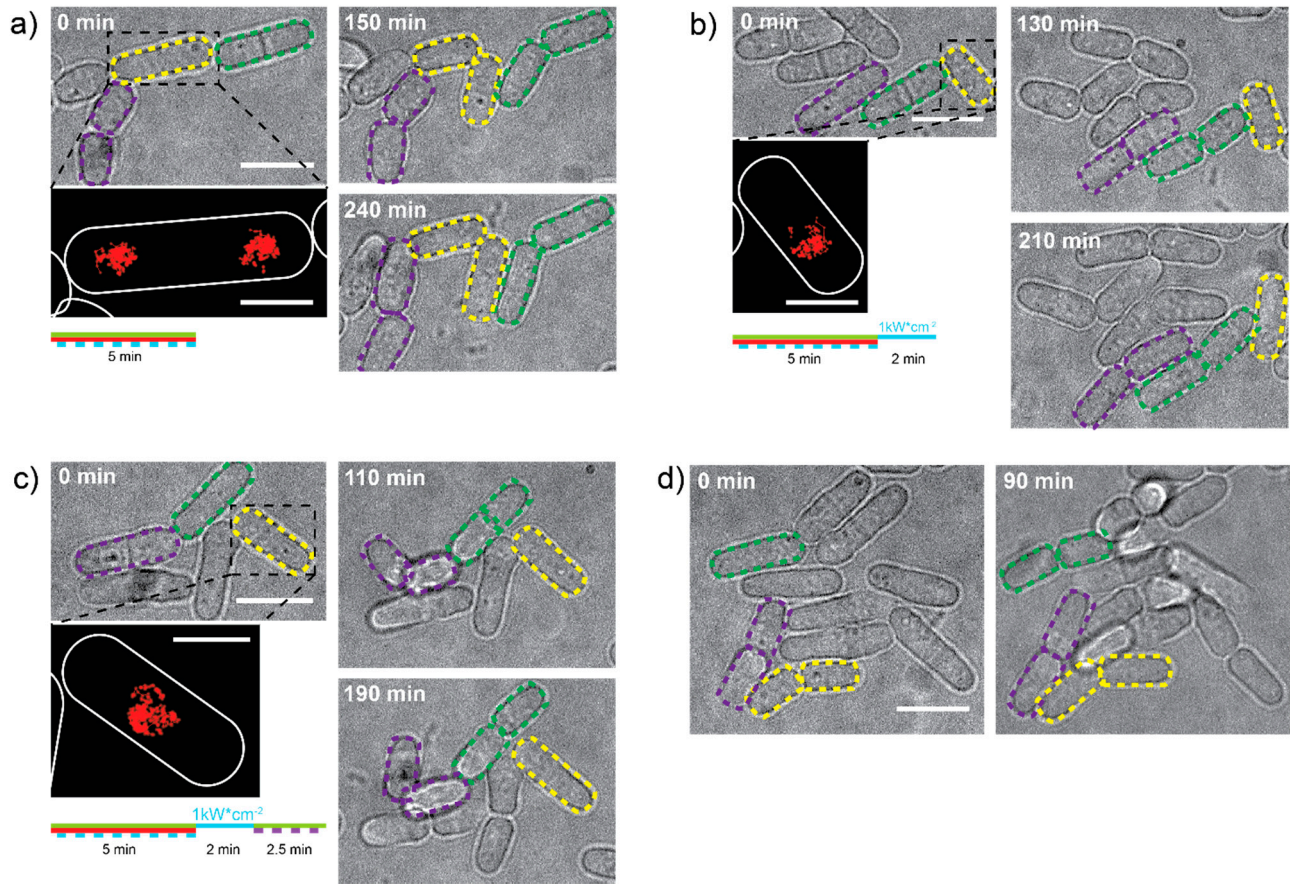

**Figure S3:** Comparison of *S. pombe* growth after different illumination schemes. Example cells are marked with dashed lines. Following the color-coded dashed lines, it is visible that the cells continue dividing and growing after imaging. Details experiment parameters are described in materials and methods. **(a)** Cell growth after 5 min of PC-PALM. **(b)** Cell growth after 5 min of PC-PALM and 2 min of 488 nm light post-bleaching. **(c)** Cell growth after 5 min of PC-PALM, 2 min of 488 nm light post-bleaching and 2.5 min of UV-PALM. The dose of UV light is not high enough to prevent cells from dividing/growing. **(d)** Control cells which were not illuminated by any laser light. Scale bars bright-field images 10  $\mu\text{m}$ . Insets display examples of single-particle-trajectory data with a length  $>4$  frames, obtained for *cbp1*-Dendra2, scale bars insets 4  $\mu\text{m}$ . Colored lines beneath spt-PALM images represent the illumination scheme used in the experiment as described in **Figure S1**.



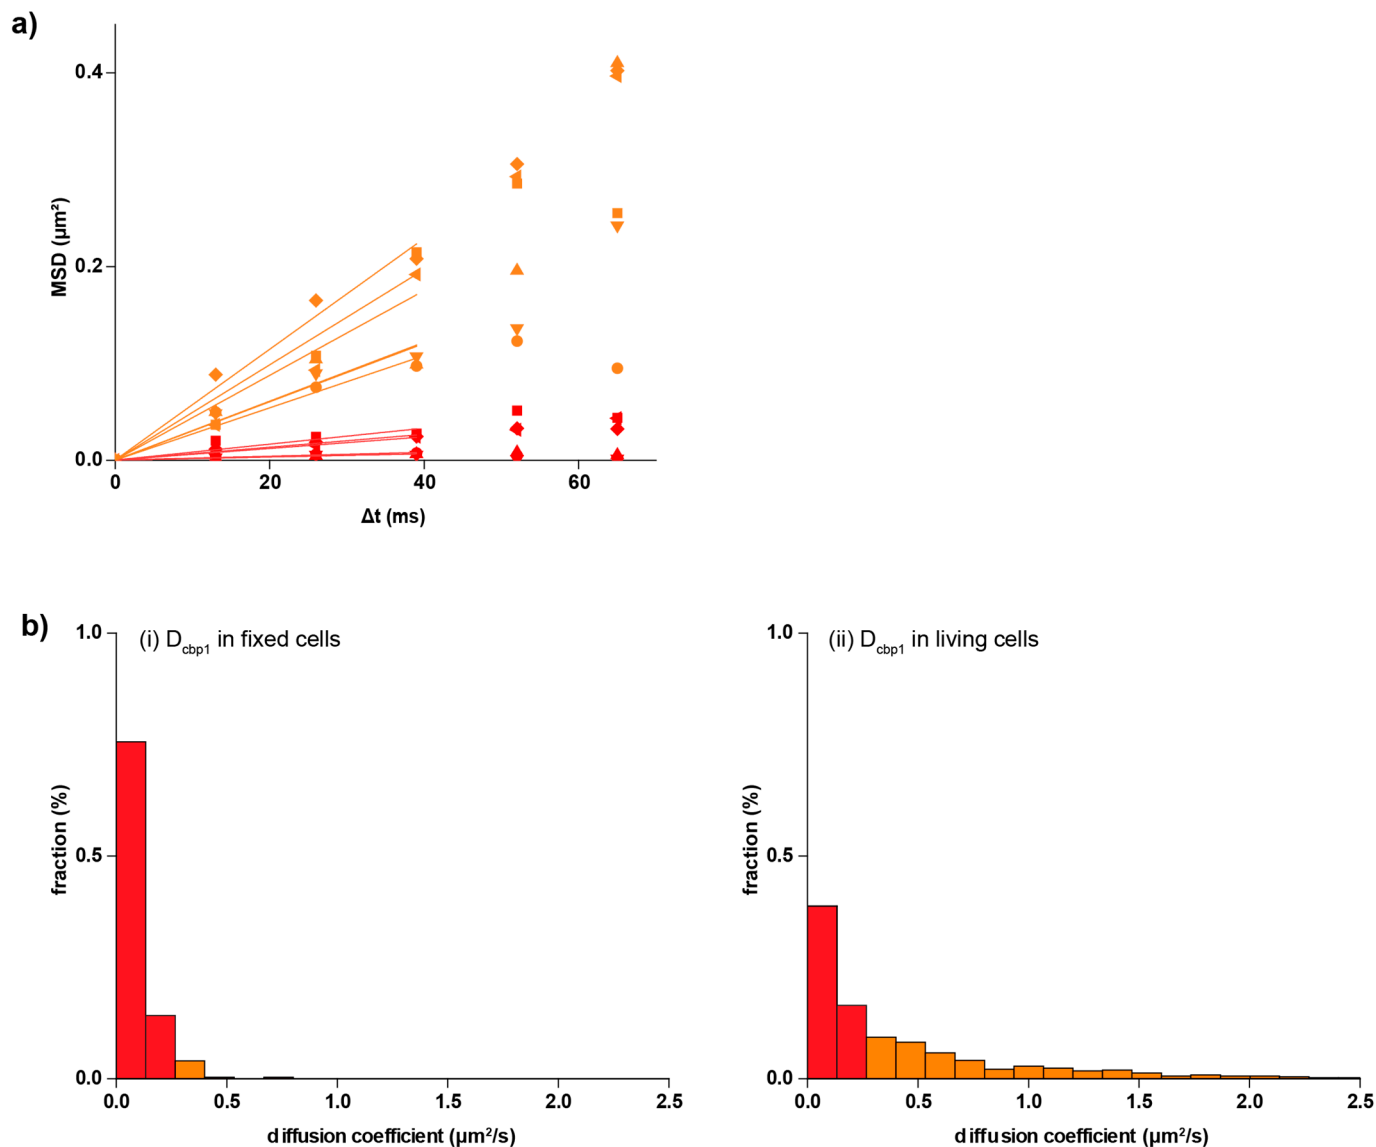

**Figure S4: (a)** Example fits of calculated MSD values, color coded red for MSDs corresponding to diffusion coefficients below  $0.26 \mu\text{m}^2/\text{s}$  and orange for MSDs corresponding to diffusion coefficients above  $0.26 \mu\text{m}^2/\text{s}$ . **(b)** Histograms of cbp1 diffusion coefficients in fixed **(i)** and living **(ii)** cells. Histogram bins are color coded as trajectories in **Figure 3b**, red for diffusion coefficients lower than  $0.26 \mu\text{m}^2/\text{s}$  and orange for diffusion coefficients above  $0.26 \mu\text{m}^2/\text{s}$ . **(i)** In fixed cells, the majority of analyzed trajectories displayed diffusion coefficients lower than  $0.26$  ( $\sim 95\%$ ). All the present cbp1 molecules are expected to be immobilized by aldehyde fixation which results in a small, non-zero diffusion coefficient in agreement with the measurement error made within the localization precision. Some free-floating background may remain, resulting in a few detected mobile molecules with diffusion coefficients above  $0.26 \mu\text{m}^2/\text{s}$ . **(ii)** In live cells, a significant fraction ( $\sim 55\%$ ) of immobile, DNA-bound cbp1 is clearly visible, while the rest of the protein moves with varying velocity. Only trajectories with a length of  $>4$  frames and MSD-curves fitted with an R-squared value  $>0.85$  were used in the analysis. The bin size of  $0.13$  was calculated using the Freedman-Diaconis rule. Number of diffusion coefficients plotted is  $275$  for fixed cells and  $462$  for live cells.

**Table S1. Strains, plasmids and construction primers used in this study**

| Strain                                             | Description                                                                                       | Reference  |
|----------------------------------------------------|---------------------------------------------------------------------------------------------------|------------|
| <i>Escherichia coli</i> strains                    |                                                                                                   |            |
| MG1655 rpoC_mEos3.2-A69T                           | MG1655 RNAP- $\beta'$ -mEos3.2-A69T, Cm <sup>R</sup>                                              | This study |
| MG1655 rpoC_mEos3.2-A69T+ pJB063                   | MG1655 RNAP- $\beta'$ -mEos3.2-A69T + pJB063-FtsZ-PAmCherry, Cm <sup>R</sup> , Spect <sup>R</sup> | This study |
| MG1655 rpoC_Dendra2                                | MG1655 RNAP- $\beta'$ -Dendra2, Cm <sup>R</sup>                                                   | [2]        |
| MG1655 rpoC_PAmCherry                              | MG1655 RNAP- $\beta'$ -PAmCherry, Amp <sup>R</sup>                                                | [4]        |
| MG1655 pBAD/HisB_pamcherry1                        | MG1655 pBAD/HisB_PAmCherry1, Amp <sup>R</sup>                                                     | This study |
| <i>Schizosaccharomyces pombe</i> strains           |                                                                                                   |            |
| cbp1_Dendra2                                       | C-terminal genomic integration, G418 resistance                                                   | This study |
| cnp1_PAmCherry                                     | N-terminal genomic integration                                                                    | [5]        |
| cnp1_PAmCherry + cbp1_Dendra2                      | Combination of above strains                                                                      | This study |
| Mammalian strains                                  |                                                                                                   |            |
| HeLa H2B-pDendra2(N)+ $\beta$ -Actin-PAmCherry1    | Transient expression from plasmid                                                                 | This study |
| HeLa Dendra2-Keratin-17+ $\beta$ -Actin-PAmCherry1 | Transient expression from plasmid                                                                 | This study |

| Plasmids for transient expression |                     |                                                                |                             |
|-----------------------------------|---------------------|----------------------------------------------------------------|-----------------------------|
| Plasmid                           | Expression organism | Description                                                    | Reference                   |
| H2B-pDendra2(N)                   | mammalian           | H2B-pDendra2(N), Kan <sup>R</sup>                              | Addgene 75283               |
| Dendra2-Tubulin-6                 | mammalian           | Dendra2-Tubulin-6, Kan <sup>R</sup>                            | Addgene 57742               |
| $\beta$ -Actin-PAmCherry1         | mammalian           | $\beta$ -Actin-PAmCherry1, Kan <sup>R</sup> , Neo <sup>R</sup> | [6]                         |
| Dendra2-Keratin-17                | mammalian           | KRT18-Dendra2, Kan <sup>R</sup>                                | Addgene 57726               |
| pJB063                            | bacteria            | pBAD-FtsZ-pamcherry1, Spect <sup>R</sup>                       | Gift from the Xiao Lab, USA |
| pBAD/HisB_PAmCherry               | bacteria            | pBAD/HisB_PAmCherry1, Amp <sup>R</sup>                         | Addgene 31931               |

| Construction primers |                                                                                    |
|----------------------|------------------------------------------------------------------------------------|
| Name                 | Sequence                                                                           |
| rpoC_mEos3.2-A69T_F  | CCAGCCTGGCAGAACTGCTGAACGCAGGTCTGGGCGGTTCTGATAACGAGgccattaaaccggatatgaaaatcaaactgcg |
| rpoC_mEos3.2-A69T_R  | CCCCCATAAAAAAACCCGCCGAAGCGGGTTTTTACGTTATTTGCGGActagagaataggaactctgccactcatc        |
| F_KanR               | GGCGCGCCAGATCTACTT                                                                 |
| R_KanR               | GACAGCAGTATAGCGACCAGC                                                              |
| F_Dendra2            | GCCGGAGGCAGTGGTATGAACACCCCGGGAATTAA                                                |
| R_Dendra2            | AGAAGTAGATCTGGCGCGCCTTACCACACCTGGCTGGG                                             |
| F1_cbp1              | CAGCCTTGTAGTGAGGGTGTG                                                              |
| R1_cbp1              | ACCACTGCCTCCGGCGGTGCTTCTCAAACGAGAAAGATTC                                           |

|                |                                                     |
|----------------|-----------------------------------------------------|
| <b>F2_cbp1</b> | AATGCTGGTCGCTATACTGCTGTCTGTCTGTATTTCGTTGTGCATATTGAC |
| <b>R2_cbp1</b> | ACGAAGCAGTTAGCAAAAGAGAAGTACA                        |

All primers were designed in Benchling (Benchling Inc.) and synthesized by Eurofins Genomics (Germany).



## Supplementary Material & Methods

### Strain constructions

***Escherichia coli* MG1655 rpoC-mEos3.2-A69T transformed with pJB063.** MG1655 expressing rpoC\_mEos3.2-A69T was generated by homologous recombination using a modified lambda red recombination pKD46 protocol [7]. Briefly, the PCR-amplified (primers listed in **Table S1**) mEos3.2-A69T-sequence followed by the frt flanked chloramphenicol resistance gene from the codon-optimized mEos3.2-A69T pBAD18 plasmid [8] with auxiliary homologous overhang sequences was electroporated (5 ms, 1.8 kV) into MG1655 cells. After verifying the strain by sequencing (Eurofins, Ebersberg, Germany), the pJB063 plasmid (**Table S1**) containing an FtsZ sequence followed by the PAmCherry fluorescent protein and spectinomycin resistance gene sequences was introduced to MG1655 rpoC-mEos3.2-A69T via electroporation (5 ms, 1.8 kV). Transformed cells were selected under chloramphenicol and spectinomycin.

***Schizosaccharomyces pombe* cbp1-Dendra2.** The cloning strategy for tagging the C-terminus of the cbp1 was adapted from [9]. The *Saccharomyces cerevisiae* ADH1 terminator and kanamycin resistance gene were amplified from the PAW8 plasmid [10] using primers F\_KanR and R\_KanR. The Dendra2 fragment with the AGGSG linker was amplified from the pRSET-Dendra2 plasmid [11] using primers F\_Dendra2 and R\_Dendra2. The upstream (~600 bp) and downstream (~500 bp) *S. pombe* homologies were amplified from genomic DNA with the primer pairs F1\_cbp1/ R1\_cbp1 and F2\_cbp1/ R2\_cbp1 (all primers listed in **Table S1**). DNA fragments were assembled with overlap-extension PCR [12], using melting temperatures of the overlapping regions as the annealing temperature in the PCR. All PCRs were performed with Q5 High-Fidelity DNA polymerase (New England Biolabs, Frankfurt, Germany). 10 µL of the PCR product were transformed into wild type *S. pombe* using the Frozen-EZ Yeast Transformation II Kit (Zymo Research, Irvine, CA, USA), plated onto YES agar plates and incubated overnight at 30 °C, then replica plated onto 200 µg/mL G418 (Thermo Fisher Scientific, Darmstadt, Germany) YES agar plates and incubated at 30 °C until single colonies were visible. Genomic integration was confirmed by colony PCR and DNA sequencing.

***S. pombe* cnp1-PAmCherry1/cbp1-Dendra2.** The DNA fragment used for transformation was amplified from genomic DNA of the previously described cbp1-Dendra2 strain with the primer pair F1\_cbp1/R2\_cbp1 (**Table S1**). The fragment, containing upstream and downstream homologies, the Dendra2 sequence and the KanR gene was then transformed into an N-terminally tagged cnp1-PAmCherry *S. pombe* strain [5] as described earlier. Integration was confirmed by colony PCR and DNA sequencing.

### Sample preparations

***Escherichia coli.*** The strain MG1655 rpoC-mEos3.2-A69T+pJB063 was taken from a -80 °C stock and was cultured overnight at 37 °C, 210 rpm, LB with 34 µg/mL chloramphenicol and 100 µg/mL spectinomycin, reinoculated into fresh LB and grown to OD 0.1. Expression of FtsZ-PAmCherry from pJB063 plasmid was induced by arabinose (0.2% *w/v*). After 30 min of induction, the culture was centrifuged (2000× *g*, 3 min) to exchange the medium for fresh LB without inducer and again incubated in 37 °C, 210 rpm for two hours. Fixation was performed for 15 min with 1% paraformaldehyde (Sigma Aldrich, Munich, Germany) and cells were washed twice in 100 mM PBS (pH 7.4). Samples were stored in 100 mM PBS (pH 7.4) or immediately immobilized on 8-well slides (Ibidi, Munich, Germany) previously cleaned with 2% Hellmanex III (Hellma Analytiks, Muellheim, Germany) and coated with 0.05% poly-L-lysine.

MG1655 rpoC-Dendra2 and MG1655 rpoC-PAmCherry genomic strains were grown from -80 °C stocks overnight at 37 °C, 210 rpm in LB medium with appropriate antibiotic marker (**Table S1**), reinoculated and grown to OD 0.2. Fixation and cell immobilization were performed as above.

Prior to imaging, a 250 thousand fold dilution of FluoSphere dark red Carboxylate-Modified Microspheres (ThermoFisher, Munich, Germany) were added to the samples and allowed to settle for 5 min to serve as markers for drift correction.

For live-cell single-particle tracking of the strain MG1655 rpoC\_mEos3.2A69T+pJB063, cells were inoculated into TB medium with chloramphenicol and spectinomycin (final concentration 34 and 100 µg/mL, respectively) and grown till OD 0.1. Then cells were induced for 45 min with 0.4% arabinose, washed with EZRDM medium (Teknova, Hollister, California, USA) and placed on 1% low melting agarose pads with EZRDM.

***Schizosaccharomyces pombe*.** Yeast was grown in YES medium (5 g Yeast extract, 30 g glucose, 225 mg of each l-adenine, histidine, leucine, uracil, lysine-hydrochloride in 1 L of Milli-Q water) at 30 °C overnight, then inoculated into fresh YES to a starting OD of 0.1, grown to an OD of 1 and inoculated into EMM (Formedium, Hunstanton, UK) with 225 mg of each l-adenine, histidine, leucine, uracil, lysine-hydrochloride in 1 L of Milli-Q water to a starting OD of 0.1 and grown overnight at 30 °C. On the day of imaging, cells were inoculated into fresh EMM from the overnight culture to a starting OD of 0.1, grown at 30 °C until the cultures reached OD 0.4. For fixed cell experiments, yeast was fixed by adding 37% PFA to the growth medium to a final concentration of 1%, incubated for 10 min then washed three times with PBS. Cells were immobilized on poly-L-lysine coated Ibidi 8-well glass bottom slides, previously cleaned with a 2% solution of Hellmanex III, and then imaged at 30 °C.

**HeLa cells.** All cell culture reagents were obtained from ThermoFisher. HeLa cells were maintained in DMEM, supplemented with 10% fetal calf serum and 1% penicillin/streptomycin. Transfection of plasmid DNA was performed with FuGENE (Promega, Mannheim, Germany) according to the manufacturer's instruction. Two plasmid combinations were used,  $\beta$ -Actin-PAmCherry1 with Dendra2-Keratin-17 and  $\beta$ -Actin-PAmCherry1 with H2B-Dendra2 (**Table S1**). For each 6-well, 1 µg of plasmid DNA was diluted in 250 µL OptiMEM following addition of 4 µL FuGENE and incubation at room temperature for 30 min. 500 ng of each plasmid (250 ng in case of H2B-Dendra2) were used for co-transfections. Diluted plasmid DNA was then added to confluent Hela cells, and the culture medium was renewed after 3 h. Cells were subcultured in 8-well glass bottom slides (Ibidi, Germany) on the subsequent day. Fixation was performed with methanol (Carl Roth, Karlsruhe, Germany) at -20 °C for 15 min. Samples were washed with 1× PBS. Prior to imaging, a 250 thousand fold dilution of FluoSphere dark red Carboxylate-Modified Microspheres were added to the well and allowed to settle for 5 min to serve as markers for drift correction.

### Purification of fluorescent proteins

The pellet of a culture overexpressing PAmCherry from a pBAD plasmid (**Table S1**) was suspended in 10 mM PBS (pH 7.4) with lysozyme (0.5 mg/mL) for 2 h, homogenized by ultrasound (UP100H, Hielscher, Germany) and centrifuged for 15 min (17000×g, 4 °C). FPs were purified from the supernatant by Ni-NTA spin columns followed by a buffer exchange to 10 mM PBS (pH 7.4) (Nanosep columns, VWR, Germany).

### Microscope

Imaging was performed on a custom built setup based on an automated Nikon Ti Eclipse microscope, equipped with appropriate dichroic and filters (ET dapi/Fitc/cy3 dichroic, ZT405/488/561rpc rejection filter, ET525/50 or ET610/75 bandpass, all AHF Analysentechnik, Germany), and a CFI Apo TIRF 100× oil objective (NA 1.49, Nikon). All lasers (405 nm OBIS, 561 nm OBIS, 730 nm OBIS, 488 nm Sapphire; all Coherent Inc., Santa Clara, California USA) except 730 nm were modulated via an acousto-optical tunable

filter (AOTF) (Gooch and Housego, Eching, Germany). Fluorescence was detected by an emCCD (iXON Ultra 888; Andor, UK). The z-focus was controlled by a commercial perfect focus system (Nikon, Duesseldorf, Germany). Acquisitions were controlled by  $\mu$ Manager [13].

### **Spectroscopy**

Absorption spectra and fluorescence spectra (**Fig. 1a–d**) were measured in V-750 and FP-8500 instruments (Jasco, Gross-Umstadt, Germany), respectively, using purified PAmCherry protein with a final concentration 100  $\mu$ M in 100 mM PBS (pH 7.5), NileRed diluted in acetone and Sytox Orange in ddH<sub>2</sub>O with final concentrations 1  $\mu$ M for both in a 50  $\mu$ l UV-transparent quartz cuvette, except spectra of mEos3.2-A69T, which was taken from our previous work [2].

## References

1. Niu, L.; Yu, J. Investigating intracellular dynamics of ftsz cytoskeleton with photoactivation single-molecule tracking. *Biophysical journal* **2008**, *95*, 2009–2016.
2. Turkowyd, B.; Balinovic, A.; Virant, D.; Golz Carnero, H.G.; Caldana, F.; Endesfelder, M.; Bourgeois, D.; Endesfelder, U. A general mechanism of photoconversion of green-to-red fluorescent proteins based on blue and infrared light reduces phototoxicity in live-cell single-molecule imaging. *Angewandte Chemie* **2017**.
3. Stracy, M.; Lesterlin, C.; Garza de Leon, F.; Uphoff, S.; Zawadzki, P.; Kapanidis, A.N. Live-cell superresolution microscopy reveals the organization of rna polymerase in the bacterial nucleoid. *PNAS* **2015**, *112*, E4390-E4399.
4. Endesfelder, U.; Finan, K.; Holden, S.J.; Cook, P.R.; Kapanidis, A.N.; Heilemann, M. Multiscale spatial organization of rna polymerase in escherichia coli. *Biophysical journal* **2013**, *105*, 172–181.
5. Lando, D.; Endesfelder, U.; Berger, H.; Subramanian, L.; Dunne, P.D.; McColl, J.; Klenerman, D.; Carr, A.M.; Sauer, M.; Allshire, R.C., *et al.* Quantitative single-molecule microscopy reveals that cenp-a(cnp1) deposition occurs during g2 in fission yeast. *Open biology* **2012**, *2*, 120078.
6. Endesfelder, U.; Malkusch, S.; Flottmann, B.; Mondry, J.; Liguzinski, P.; Verveer, P.J.; Heilemann, M. Chemically induced photoswitching of fluorescent probes--a general concept for super-resolution microscopy. *Molecules* **2011**, *16*, 3106–3118.
7. Datsenko, K.A.; Wanner, B.L. One-step inactivation of chromosomal genes in escherichia coli k-12 using pcr products. *Proceedings of the National Academy of Sciences of the United States of America* **2000**, *97*, 6640–6645.
8. Wang, S.; Moffitt, J.R.; Dempsey, G.T.; Xie, X.S.; Zhuang, X. Characterization and development of photoactivatable fluorescent proteins for single-molecule-based superresolution imaging. *PNAS* **2014**, *111*, 8452–8457.
9. Hayashi, A.; Ding, D.Q.; Tsutsumi, C.; Chikashige, Y.; Masuda, H.; Haraguchi, T.; Hiraoka, Y. Localization of gene products using a chromosomally tagged gfp-fusion library in the fission yeast schizosaccharomyces pombe. *Genes to cells : devoted to molecular & cellular mechanisms* **2009**, *14*, 217–225.
10. Watson, A.T.; Garcia, V.; Bone, N.; Carr, A.M.; Armstrong, J. Gene tagging and gene replacement using recombinase-mediated cassette exchange in schizosaccharomyces pombe. *Gene* **2008**, *407*, 63–74.
11. Berardozi, R.; Adam, V.; Martins, A.; Bourgeois, D. Arginine 66 controls dark-state formation in green-to-red photoconvertible fluorescent proteins. *Journal of the American Chemical Society* **2016**, *138*, 558–565.
12. Bryksin, A.V.; Matsumura, I. Overlap extension pcr cloning: A simple and reliable way to create recombinant plasmids. *BioTechniques* **2010**, *48*, 463–465.
13. Edelstein, A.; Amodaj, N.; Hoover, K.; Vale, R.; Stuurman, N. Computer control of microscopes using micromanager. *Current protocols in molecular biology / edited by Frederick M. Ausubel [et al.]* **2010**, Chapter 14, Unit14 20.
